# Supplementary material
Source: publisher figshare collection journal article supplement (https://acs.figshare.com/ndownloader/files/4746832)
Supplement: Supplementary file 1 [file 4746832]

# CIF Copied by cif2cif, version 0.0.8 - beta ( 2 Apr 98)
data_global
_audit_creation_method 'maXus'
_publ_contact_author_name 'Zeynep Delen, Paul M. Lahti'
_publ_contact_author_address
;
Department of Chemistry, University of Massachusetts, Amherst, MA 01003 USA
;
_publ_contact_author_email 'lahti@chem.umass.edu '
_publ_contact_author_fax '1-413-545-4490 '
_publ_contact_author_phone '1-413-545-4890'
_publ_section_title
;
?
;
_publ_section_abstract
;
;
_publ_section_comment
;
The study of the titled structure was undertaken to establish its three
dimensional structure.  Geometries are tabulated below.  All Diagrams and
calculations were performed using maXus (Nonius, Delft & MacScience, Japan).  
We thank Dr. Peter Khalifah for assistance with this analysis.
;
_publ_section_synopsis
;

;
_publ_section_exptl_prep
;

;
_publ_section_exptl_refinement
;

;
_publ_section_figure_captions
;

;
_publ_section_acknowledgements
;

;
_chemical_compound_source        'zd3090'
_exptl_crystal_description       'needle'
_exptl_crystal_colour            'red'
_cell_measurement_temperature     298
_refine_ls_hydrogen_treatment    'noref'
 
 
# Submission details
_publ_requested_journal ' Journal of Organic Chemistry ' #'
_diffrn_measurement_device  'KappaCCD'
_computing_data_collection  'KappaCCD'
_computing_data_reduction  'Denzo and Scalepak (Otwinowski & Minor, 1997)'
 
_diffrn_radiation_source  'fine-focus sealed tube'
_diffrn_reflns_limit_h_min    -31
_diffrn_reflns_limit_h_max     32
_diffrn_reflns_limit_k_min     -6
_diffrn_reflns_limit_k_max      6
_diffrn_reflns_limit_l_min     -9
_diffrn_reflns_limit_l_max      9
 
loop_
 _diffrn_radiation_wavelength     0.71073
_diffrn_radiation_wavelength_id all
 
 
_diffrn_orient_matrix_type 'X=UH'
_diffrn_orient_matrix_UB_11    0.02732
_diffrn_orient_matrix_UB_12    0.09430
_diffrn_orient_matrix_UB_13   -0.14153
_diffrn_orient_matrix_UB_21   -0.09711
_diffrn_orient_matrix_UB_22   -0.05569
_diffrn_orient_matrix_UB_23   -0.05585
_diffrn_orient_matrix_UB_31   -0.02233
_diffrn_orient_matrix_UB_32    0.02593
_diffrn_orient_matrix_UB_33    0.01297
 
_cell_formula_units_Z     4
_exptl_crystal_density_diffrn    1.201
_exptl_crystal_density_method  'not measured'
_exptl_special_details
;
?
;
_chemical_formula_weight    229.303
_diffrn_radiation_type    ' MoK\a'
 
loop_
 _symmetry_equiv_pos_as_xyz
'+X,+Y,+Z'
'-X,-Y,+Z+ 1/2'
'-X+ 1/2,+Y+ 1/2,+Z+ 1/2'
'+X+ 1/2,-Y+ 1/2,+Z'
 
_symmetry_space_group_name_H-M 'P n a 21      '
_symmetry_cell_setting 'Orthorhombic'
_chemical_formula_moiety 'C14 H17 N2 O '
_chemical_formula_sum    'C14 H17 N2 O '
_chemical_name_systematic
;
 ?
;
_cell_length_a          27.3232(12)
_cell_length_b            5.8054(2)
_cell_length_c            7.9936(3)
_cell_angle_alpha                90.00
_cell_angle_beta                 90.00
_cell_angle_gamma                90.00
_cell_volume             1267.96(9)
_diffrn_reflns_number   2213
_diffrn_reflns_theta_max  25.01
_diffrn_reflns_theta_min   1.49
_diffrn_reflns_theta_full  25.01
_cell_measurement_reflns_used     1282
_cell_measurement_theta_min        1.018
_cell_measurement_theta_max        25.028
_diffrn_measurement_method       'CCD'
_computing_cell_refinement 'HKL Scalepack (Otwinowski & Minor 1997)'
_exptl_absorpt_correction_type  none
_exptl_absorpt_correction_T_min   ?
_exptl_absorpt_correction_T_max   ?
_exptl_crystal_F_000              588 
 
loop_
 _atom_type_symbol
 _atom_type_description
 _atom_type_scat_dispersion_real
 _atom_type_scat_dispersion_imag
 _atom_type_scat_source
 'C'  'C'   0.0033   0.0016
 'International Tables Vol C Tables 4.2.6.8 and 6.1.1.4'
 'H'  'H'   0.0000   0.0000
 'International Tables Vol C Tables 4.2.6.8 and 6.1.1.4'
 'N'  'N'   0.0061   0.0033
 'International Tables Vol C Tables 4.2.6.8 and 6.1.1.4'
 'O'  'O'   0.0106   0.0060
 'International Tables Vol C Tables 4.2.6.8 and 6.1.1.4'
 
_exptl_absorpt_coefficient_mu     0.077
_reflns_number_total              2060
_reflns_number_gt                 1642
_reflns_threshold_expression      >2sigma(I)
 
_computing_structure_refinement   'SHELXL-97 (Sheldrick, 1997)'
_refine_special_details
;
 Refinement of F^2^ against ALL reflections.  The weighted R-factor wR and
 goodness of fit S are based on F^2^, conventional R-factors R are based
 on F, with F set to zero for negative F^2^. The threshold expression of
 F^2^ > 2sigma(F^2^) is used only for calculating R-factors(gt) etc. and is
 not relevant to the choice of reflections for refinement.  R-factors based
 on F^2^ are statistically about twice as large as those based on F, and R-
 factors based on ALL data will be even larger.
;
 
_refine_ls_structure_factor_coef  Fsqd
_refine_ls_matrix_type            full
_refine_ls_weighting_scheme       calc
_refine_ls_weighting_details
 'calc w=1/[\s^2^(Fo^2^)+(0.0589P)^2^+0.0865P] where P=(Fo^2^+2Fc^2^)/3'
_refine_ls_extinction_method      none
_refine_ls_extinction_coef        ?
_refine_ls_abs_structure_details
 'Flack H D (1983), Acta Cryst. A39, 876-881'
_refine_ls_abs_structure_Flack    0(2)
_refine_ls_number_reflns          2060
_refine_ls_number_parameters      156
_refine_ls_number_restraints      1
_refine_ls_R_factor_all           0.0613
_refine_ls_R_factor_gt            0.0422
_refine_ls_wR_factor_ref          0.1140
_refine_ls_wR_factor_gt           0.1022
_refine_ls_goodness_of_fit_ref    1.063
_refine_ls_restrained_S_all       1.063
_refine_ls_shift/su_max           0.298
_refine_ls_shift/su_mean          0.004
 
loop_
 _atom_site_label
 _atom_site_type_symbol
 _atom_site_fract_x
 _atom_site_fract_y
 _atom_site_fract_z
 _atom_site_U_iso_or_equiv
 _atom_site_adp_type
 _atom_site_occupancy
 _atom_site_symmetry_multiplicity
 _atom_site_calc_flag
 _atom_site_refinement_flags
 _atom_site_disorder_assembly
 _atom_site_disorder_group
O1 O 0.30879(8) 0.0538(5) 0.1171(3) 0.1192(9) Uani 1 1 d . . .
N1 N 0.32912(7) 0.0112(3) 0.2570(2) 0.0689(5) Uani 1 1 d . . .
N2 N 0.52679(7) 0.2900(3) 0.2934(2) 0.0625(5) Uani 1 1 d . . .
C1 C 0.29850(8) -0.0981(4) 0.3908(3) 0.0615(6) Uani 1 1 d . . .
C2 C 0.24574(8) -0.0279(5) 0.3592(4) 0.0831(8) Uani 1 1 d . . .
C3 C 0.30358(10) -0.3576(4) 0.3795(4) 0.0865(8) Uani 1 1 d . . .
C4 C 0.31355(11) -0.0076(4) 0.5613(3) 0.0750(7) Uani 1 1 d . . .
C5 C 0.37951(8) 0.0751(4) 0.2718(3) 0.0606(5) Uani 1 1 d . . .
C6 C 0.41322(8) -0.0428(4) 0.3703(3) 0.0681(7) Uani 1 1 d . . .
C7 C 0.39581(8) 0.2610(4) 0.1788(3) 0.0668(6) Uani 1 1 d . . .
C8 C 0.46129(8) 0.0285(4) 0.3766(3) 0.0679(7) Uani 1 1 d . . .
C9 C 0.44355(9) 0.3305(4) 0.1857(3) 0.0681(6) Uani 1 1 d . . .
C10 C 0.47741(8) 0.2164(4) 0.2858(3) 0.0560(5) Uani 1 1 d . . .
C11 C 0.56466(9) 0.1791(4) 0.3738(4) 0.0735(7) Uani 1 1 d . . .
C12 C 0.54602(11) 0.4864(5) 0.2235(4) 0.0828(8) Uani 1 1 d . . .
C13 C 0.60587(9) 0.3035(5) 0.3549(4) 0.0842(8) Uani 1 1 d . . .
C14 C 0.59433(11) 0.4938(5) 0.2598(4) 0.0925(9) Uani 1 1 d . . .
H2A H 0.2356 -0.0833 0.2515 0.125 Uiso 1 1 calc R . .
H2B H 0.2432 0.1370 0.3620 0.125 Uiso 1 1 calc R . .
H2C H 0.2251 -0.0929 0.4443 0.125 Uiso 1 1 calc R . .
H3A H 0.2939 -0.4083 0.2701 0.130 Uiso 1 1 calc R . .
H3B H 0.2831 -0.4287 0.4622 0.130 Uiso 1 1 calc R . .
H3C H 0.3370 -0.4002 0.3991 0.130 Uiso 1 1 calc R . .
H4A H 0.3107 0.1573 0.5626 0.112 Uiso 1 1 calc R . .
H4B H 0.3468 -0.0506 0.5836 0.112 Uiso 1 1 calc R . .
H4C H 0.2926 -0.0721 0.6455 0.112 Uiso 1 1 calc R . .
H6 H 0.4033 -0.1702 0.4321 0.082 Uiso 1 1 calc R . .
H7 H 0.3739 0.3398 0.1106 0.080 Uiso 1 1 calc R . .
H8 H 0.4834 -0.0516 0.4433 0.082 Uiso 1 1 calc R . .
H9 H 0.4536 0.4563 0.1224 0.082 Uiso 1 1 calc R . .
H11 H 0.5622 0.0407 0.4318 0.088 Uiso 1 1 calc R . .
H12 H 0.5288 0.5955 0.1619 0.099 Uiso 1 1 calc R . .
H13 H 0.6365 0.2676 0.3981 0.101 Uiso 1 1 calc R . .
H14 H 0.6161 0.6080 0.2263 0.111 Uiso 1 1 calc R . .
 
loop_
 _atom_site_aniso_label
 _atom_site_aniso_U_11
 _atom_site_aniso_U_22
 _atom_site_aniso_U_33
 _atom_site_aniso_U_23
 _atom_site_aniso_U_13
 _atom_site_aniso_U_12
O1 0.0769(13) 0.202(2) 0.0790(14) 0.0495(14) -0.0209(11) -0.0173(13)
N1 0.0602(11) 0.0881(14) 0.0584(12) 0.0181(10) -0.0058(9) -0.0010(9)
N2 0.0628(11) 0.0638(11) 0.0610(10) -0.0013(9) 0.0067(9) -0.0037(9)
C1 0.0588(12) 0.0591(12) 0.0667(14) 0.0088(11) 0.0020(10) -0.0008(10)
C2 0.0610(14) 0.0911(19) 0.097(2) 0.0151(15) 0.0006(15) 0.0008(12)
C3 0.0938(19) 0.0593(14) 0.106(2) -0.0001(14) 0.0042(17) 0.0032(12)
C4 0.0824(18) 0.0777(18) 0.0649(16) 0.0064(12) 0.0048(12) 0.0028(13)
C5 0.0606(12) 0.0667(12) 0.0544(12) 0.0075(11) 0.0010(10) 0.0036(10)
C6 0.0618(14) 0.0668(13) 0.0758(17) 0.0253(13) -0.0021(11) -0.0021(10)
C7 0.0611(14) 0.0774(15) 0.0619(14) 0.0237(11) 0.0010(10) 0.0083(12)
C8 0.0633(13) 0.0706(14) 0.0698(16) 0.0220(13) -0.0067(11) 0.0040(10)
C9 0.0743(16) 0.0632(14) 0.0668(14) 0.0182(12) 0.0092(11) 0.0037(11)
C10 0.0601(12) 0.0554(12) 0.0526(11) 0.0008(10) 0.0057(10) 0.0017(9)
C11 0.0640(14) 0.0773(15) 0.0794(16) -0.0056(13) 0.0022(12) 0.0029(11)
C12 0.086(2) 0.0791(17) 0.084(2) 0.0098(13) 0.0107(15) -0.0188(13)
C13 0.0639(16) 0.101(2) 0.0875(19) -0.0272(18) 0.0118(13) -0.0057(14)
C14 0.085(2) 0.105(2) 0.087(2) -0.0157(18) 0.0250(16) -0.0348(17)
 
_geom_special_details
;
 All esds (except the esd in the dihedral angle between two l.s. planes)
 are estimated using the full covariance matrix.  The cell esds are taken
 into account individually in the estimation of esds in distances, angles
 and torsion angles; correlations between esds in cell parameters are only
 used when they are defined by crystal symmetry.  An approximate (isotropic)
 treatment of cell esds is used for estimating esds involving l.s. planes.
;
 
loop_
 _geom_bond_atom_site_label_1
 _geom_bond_atom_site_label_2
 _geom_bond_distance
 _geom_bond_site_symmetry_2
 _geom_bond_publ_flag
O1 N1 1.273(3) . ?
N1 C5 1.431(3) . ?
N1 C1 1.499(3) . ?
N2 C12 1.374(3) . ?
N2 C11 1.378(3) . ?
N2 C10 1.416(3) . ?
C1 C3 1.515(3) . ?
C1 C4 1.518(4) . ?
C1 C2 1.519(3) . ?
C5 C7 1.384(3) . ?
C5 C6 1.391(3) . ?
C6 C8 1.378(3) . ?
C7 C9 1.366(3) . ?
C8 C10 1.382(3) . ?
C9 C10 1.391(3) . ?
C11 C13 1.346(4) . ?
C12 C14 1.352(4) . ?
C13 C14 1.377(4) . ?
 
loop_
 _geom_angle_atom_site_label_1
 _geom_angle_atom_site_label_2
 _geom_angle_atom_site_label_3
 _geom_angle
 _geom_angle_site_symmetry_1
 _geom_angle_site_symmetry_3
 _geom_angle_publ_flag
O1 N1 C5 116.26(18) . . ?
O1 N1 C1 117.73(17) . . ?
C5 N1 C1 126.01(18) . . ?
C12 N2 C11 106.9(2) . . ?
C12 N2 C10 126.7(2) . . ?
C11 N2 C10 126.47(19) . . ?
N1 C1 C3 109.12(19) . . ?
N1 C1 C4 110.05(18) . . ?
C3 C1 C4 111.9(2) . . ?
N1 C1 C2 107.32(19) . . ?
C3 C1 C2 110.1(2) . . ?
C4 C1 C2 108.24(19) . . ?
C7 C5 C6 118.3(2) . . ?
C7 C5 N1 117.86(19) . . ?
C6 C5 N1 123.80(19) . . ?
C8 C6 C5 120.3(2) . . ?
C9 C7 C5 121.1(2) . . ?
C6 C8 C10 121.4(2) . . ?
C7 C9 C10 121.1(2) . . ?
C8 C10 C9 117.8(2) . . ?
C8 C10 N2 121.28(19) . . ?
C9 C10 N2 120.96(19) . . ?
C13 C11 N2 109.0(3) . . ?
C14 C12 N2 108.2(3) . . ?
C11 C13 C14 107.5(3) . . ?
C12 C14 C13 108.5(2) . . ?
 
_diffrn_measured_fraction_theta_max    0.983
_diffrn_measured_fraction_theta_full   0.983
_refine_diff_density_max    0.103
_refine_diff_density_min   -0.112
_refine_diff_density_rms    0.030
 
_publ_section_references
;
Mackay, S., Gilmore, C. J.,Edwards, C., Stewart, N. & Shankland, K.
(1999). maXus  Computer Program for the Solution and Refinement of
Crystal Structures. Bruker Nonius, The Netherlands, MacScience, Japan
& The University of Glasgow.

Johnson, C. K. (1976). ORTEP-II. A Fortran Thermal-Ellipsoid Plot
Program. Report ORNL-5138. Oak Ridge National Laboratory, Oak Ridge,
Tennessee, USA.

Otwinowski, Z. and Minor, W, (1997). In Methods in Enzymology, 276,
edited by C.W. Carter, Jr. & R.M. Sweet pp. 307-326,
New York:Academic Press.

Altomare, A., Burla, M.C., Camalli, M., Cascarano, G.L.,
Giacovazzo, C., Guagliardi, A., Moliterni, A.G.G & Spagna, R.
(1999). J. Appl. Cryst. 32, 115-119.

Sheldrick, G. M. (1997).  SHELXL97.  Program for the Refinement of Crystal
Structures.  University of G\"ottingen, Germany.

;
 
